# Supplementary material for: Electrochemical ammonia oxidation using nickel copper hydroxide with H2 recovery at high current density and selectivity
Source: Royal Society of Chemistry journal article supplement (doi:10.1039/d5gc06877k), 2026-05-01
Supplement: d5gc06877k1.pdf [file d5gc06877k1.pdf]

## Supplementary Information

### Electrochemical Ammonia Oxidation at Nickel Copper Hydroxide with H<sub>2</sub> Recovery at High Current Density and Selectivity

D.D. van Noordenne,<sup>a</sup> P.J. Jungbacker<sup>a</sup>, A. Urakawa<sup>a</sup>, and F.M. Mulder<sup>a,\*</sup>

<sup>a</sup> Chemical Engineering, Faculty of Applied Sciences, Delft University of Technology, 2629 HZ Delft, the Netherlands

#### Supplementary note 1: Calculation of equilibrium potentials of relevant ammonia oxidation reactions

The calculation of equilibrium potentials with respect to the Reversible Hydrogen Electrode (RHE) in an alkaline electrolyte at pH 14 can be done by calculating the cell potentials  $E_{\text{RHE}}$  of a cell with the RHE as counter electrode. RHE itself at pH 14 has the half reaction:

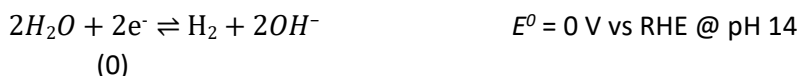

Equations (1)-(3) are given below again for convenience, while (4) is given for completion:

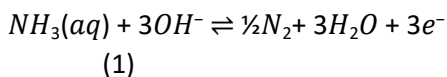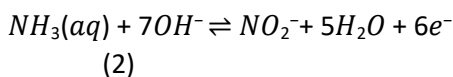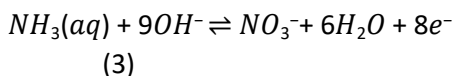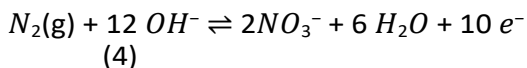

The potential difference with the RHE electrode can be determined by calculating  $\Delta G$  and the cell potential for the two balanced equations (0) and

(1), (0) and (2), and (0) and (3), taking the number z of electrons involved into account.

The potential of (1) vs RHE can be determined from the difference between (0) and (1):

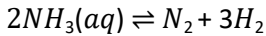

$$\Delta G = G(\text{N}_2) + G(\text{H}_2) - G(\text{NH}_3(\text{Aq})) = 0 + 0 - (-26.57 \times 2) = 53.1 \text{ kJ/mol}$$

$E_{\text{RHE}} = -\Delta G/zF = -53.1 \text{e}3 / (6 \times 96485) = -0.091 \text{ V}$  with the negative sign stemming from the applied potential having the opposite direction of electron flow. The potential of the positive electrode where (1) runs is then +0.091V higher than where (0) runs. The potential of (1) at pH 14 versus SHE becomes:

$$(1) E_0 = -0.0592 \times 14 - (-0.091) = -0.74 \text{ V vs SHE @ pH 14}$$

The potential of (2) vs RHE can be determined from the difference between (0) and (2):

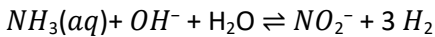

$$\Delta G = G(\text{NO}_2^-(\text{aq})) + G(3\text{H}_2) - (G(\text{NH}_3(\text{aq})) + G(\text{OH}^-) + G(\text{H}_2\text{O})) =$$

$$= -34.31 + 0 - (-26.57 - 157.32 - 237.2) = +386.8 \text{ kJ/mol}$$

$$E_{\text{RHE}} = -\Delta G/zF = -386.8 \text{e}3 / (6 \times 96485) = -0.67 \text{ V}$$

The potential versus SHE, when (3) is at pH 14 then becomes:

$$(2) E_0 = -0.0592 \times 14 - (-0.67) = -0.16 \text{ V vs SHE @ pH 14}$$

The potential of (3) vs RHE can be determined from the difference between (0) and (3):

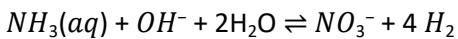

$$\Delta G = G(\text{NO}_3^-(\text{aq})) + G(4\text{H}_2) - (G(\text{NH}_3(\text{aq})) + G(\text{OH}^-) + G(2\text{H}_2\text{O})) =$$

$$= -110.46 + 0 - (-26.57 - 157.32 - 237.2 \times 2) = 547.8 \text{ kJ/mol}$$

$$E_{\text{RHE}} = -\Delta G/zF = -547.8 \text{e}3 / (8 \times 96485) = -0.71 \text{ V}$$

The potential versus SHE, when (3) is at pH 14 then becomes:

$$(3) E_0 = -0.0592 \times 14 - (-0.71) = -0.12 \text{ V vs SHE @ pH 14}$$

The potential of (4) vs RHE can be determined from the difference between (0) and (4):

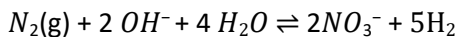

$$\begin{aligned} \Delta G &= 2G(NO_3^-(aq)) + 5 G(H_2) - (G(N_2) + 2G(OH^-) + 4G(2H_2O)) = \\ &= -110.46 \times 2 + 0 - (0 - 157.3 \times 2 - 237.2 \times 4) = 1042.48 \text{ kJ/mol} \end{aligned}$$

$$E_{RHE} = -\Delta G/zF = -1042.48 \text{ e3} / (10 \times 96485) = -1.08 \text{ V}$$

The potential versus SHE, when (4) is at pH 14 then becomes:

$$(4) E_0 = -0.0592 \times 14 - (-1.08) = +0.25 \text{ V vs SHE @ pH 14}$$

Although one may expect to observe (4) at similar potentials as the AOR reactions, in practice the direct di-nitrogen electrochemical oxidation has proven to be difficult to be observed in any proposed catalytic system yet. For further information see [19].

**Table S1.** The performance of various electrocatalyst towards selective and high Faradaic efficient electrochemical ammonia oxidation. Underlined potential and current density are the applied values. Where applicable the FE is calculated from the reported product concentrations in the references and the (estimated average) current applied.

| AOR Catalyst     | Membrane    | Counter Electrode          | Electrolyte                                   | Ammonia                                                | Potential (V)         | Current Density (mA/cm <sup>2</sup> ) | FE <sub>N<sub>2</sub></sub> (%) | FE <sub>NO<sub>2</sub><sup>-</sup></sub> (%) | FE <sub>NO<sub>3</sub><sup>-</sup></sub> (%) | Ref. |
|------------------|-------------|----------------------------|-----------------------------------------------|--------------------------------------------------------|-----------------------|---------------------------------------|---------------------------------|----------------------------------------------|----------------------------------------------|------|
| IrO <sub>2</sub> | —           | Ti                         | 0.1 M Na <sub>2</sub> SO <sub>4</sub> , pH 7  | 0.5 M (NH <sub>4</sub> ) <sub>2</sub> SO <sub>4</sub>  |                       | <u>80</u>                             | 4                               |                                              |                                              | [1]  |
| IrO <sub>2</sub> | Nafion® 424 | Ti                         | 0.1 M Na <sub>2</sub> SO <sub>4</sub> , pH 7  | 0.5 M (NH <sub>4</sub> ) <sub>2</sub> SO <sub>4</sub>  |                       | <u>80</u>                             | 12                              |                                              |                                              | [1]  |
| IrO <sub>2</sub> | —           | Ti                         | 0.1 M Na <sub>2</sub> SO <sub>4</sub> , pH 7  | 1 M NH <sub>4</sub> Cl                                 |                       | <u>80</u>                             | 38                              |                                              |                                              | [1]  |
| IrO <sub>2</sub> | Nafion® 424 | Ti                         | 0.1 M Na <sub>2</sub> SO <sub>4</sub> , pH 7  | 1 M NH <sub>4</sub> Cl                                 |                       | <u>80</u>                             | 57                              |                                              |                                              | [1]  |
| IrO <sub>2</sub> | —           | Ti                         | 0.1 M Na <sub>2</sub> SO <sub>4</sub> , pH 12 | 0.5 M (NH <sub>4</sub> ) <sub>2</sub> SO <sub>4</sub>  |                       | <u>80</u>                             | 35                              |                                              |                                              | [1]  |
| IrO <sub>2</sub> | Nafion® 424 | Ti                         | 0.1 M Na <sub>2</sub> SO <sub>4</sub> , pH 12 | 0.5 M (NH <sub>4</sub> ) <sub>2</sub> SO <sub>4</sub>  |                       | <u>80</u>                             | 67                              |                                              |                                              | [1]  |
| IrO <sub>2</sub> | —           | Ti                         | 0.1 M Na <sub>2</sub> SO <sub>4</sub> , pH 12 | 1 M NH <sub>4</sub> Cl                                 |                       | <u>80</u>                             | 42                              |                                              |                                              | [1]  |
| IrO <sub>2</sub> | Nafion® 424 | Ti                         | 0.1 M Na <sub>2</sub> SO <sub>4</sub> , pH 12 | 1 M NH <sub>4</sub> Cl                                 |                       | <u>80</u>                             | 85                              |                                              |                                              | [1]  |
| Pt-Ir-Rh         | —           | Pt-Ir-Rh                   | 0.2 M KOH                                     | 21.5 mM NH <sub>4</sub> OH                             | <1 Cell               | <u>25</u>                             | 92                              |                                              |                                              | [2]  |
| NiCu             | —           | Pt/C                       | 1 M NaOH, pH 12                               | 29 mM NH <sub>4</sub> Cl                               | <u>1.0 Cell</u>       |                                       | 93                              |                                              |                                              | [3]  |
| NiCu             | —           | Pt/C                       | 1 M NaOH, pH 12                               | 29 mM NH <sub>4</sub> Cl                               | <u>1.1 Cell</u>       |                                       | 81                              |                                              |                                              | [3]  |
| Ni foam          | —           | IrO <sub>2</sub> /Ti plate | 0.1 M Na <sub>2</sub> SO <sub>4</sub> , pH 11 | 0.6 mM (NH <sub>4</sub> ) <sub>2</sub> SO <sub>4</sub> | <u>0.8 vs. Hg/HgO</u> |                                       | 3                               | 0                                            | 19                                           | [4]  |
| NiCuFeOOH        | —           | Pt foil                    | 0.5 NaOH, pH 13.6                             | 55 mM NH <sub>4</sub> Cl                               | <u>0.4 vs. SCE</u>    |                                       | 41                              |                                              |                                              | [5]  |
| NiCuFeOOH        | —           | Pt foil                    | 0.5 NaOH,                                     | 55 mM NH <sub>4</sub> Cl                               | <u>0.55 vs. SCE</u>   |                                       | 15                              |                                              |                                              | [5]  |

|                                           |            |            |                                       |                                                        |                       |          |    |    |    |     |
|-------------------------------------------|------------|------------|---------------------------------------|--------------------------------------------------------|-----------------------|----------|----|----|----|-----|
|                                           |            |            | pH 13.6                               |                                                        |                       |          |    |    |    |     |
| <b>Cu</b>                                 | Glass frit | Pt wire    | 0.01 M KOH                            | 0.1 M NH <sub>4</sub> OH                               | <u>1.8 vs. RHE</u>    | 2        |    | 85 | 0  | [6] |
| <b>Cu</b>                                 | Glass frit | Pt wire    | 0.01 M KOH                            | 0.1 M NH <sub>4</sub> OH                               | <u>1.7 vs. RHE</u>    | 5-40     |    | 9  | 44 | [6] |
| <b>Cu</b>                                 | Glass frit | Pt wire    | 0.11 M KOH                            | 0.1 M NH <sub>4</sub> OH                               | <u>1.7 vs. RHE</u>    | 2        |    | 86 | 0  | [6] |
| <b>Cu</b>                                 | Glass frit | Pt wire    | 0.11 M KOH                            | 0.1 M NH <sub>4</sub> OH                               | <u>1.8 vs. RHE</u>    | 4        |    | 62 | 5  | [6] |
| <b>Cu</b>                                 | Glass frit | Pt wire    | 0.11 M KOH                            | 0.1 M NH <sub>4</sub> OH                               | <u>2.0 vs. RHE</u>    | 25-40    |    | 36 | 29 | [6] |
| <b>Cu</b>                                 | Glass frit | Pt wire    | 1.1 M KOH                             | 0.1 M NH <sub>4</sub> OH                               | <u>1.7 vs. RHE</u>    |          |    | 55 | 0  | [6] |
| <b>Cu</b>                                 | Glass frit | Pt wire    | 1.1 M KOH                             | 0.1 M NH <sub>4</sub> OH                               | <u>1.8 vs. RHE</u>    | 4        |    | 27 | 9  | [6] |
| <b>V<sub>0</sub>-rich CuO<sup>a</sup></b> | —          | Carbon rod | 1 M KOH                               | 1 M NH <sub>4</sub> OH                                 | <u>0.6 vs. Hg/HgO</u> |          | 63 | 34 | 0  | [7] |
| <b>V<sub>0</sub>-Poor CuO<sup>a</sup></b> | —          | Carbon rod | 1 M KOH                               | 1 M NH <sub>4</sub> OH                                 | <u>0.6 vs. Hg/HgO</u> |          | 26 | 72 | 0  | [7] |
| <b>Pt</b>                                 | —          | Ti plate   | 0.1 M Na <sub>2</sub> SO <sub>4</sub> | 1.5 mM (NH <sub>4</sub> ) <sub>2</sub> SO <sub>4</sub> |                       | <u>1</u> | 5  | 0  | 0  | [8] |
| <b>Ni</b>                                 | —          | Ti plate   | 0.1 M Na <sub>2</sub> SO <sub>4</sub> | 1.5 mM (NH <sub>4</sub> ) <sub>2</sub> SO <sub>4</sub> |                       | <u>1</u> | 4  | 8  | 50 | [8] |
| <b>Cu</b>                                 | —          | Ti plate   | 0.1 M Na <sub>2</sub> SO <sub>4</sub> | 1.5 mM (NH <sub>4</sub> ) <sub>2</sub> SO <sub>4</sub> |                       | <u>1</u> | 6  | 0  | 54 | [8] |
| <b>PtNi</b>                               | —          | Ti plate   | 0.1 M Na <sub>2</sub> SO <sub>4</sub> | 1.5 mM (NH <sub>4</sub> ) <sub>2</sub> SO <sub>4</sub> |                       | <u>1</u> | 5  | 13 | 25 | [8] |
| <b>PtCu</b>                               | —          | Ti plate   | 0.1 M Na <sub>2</sub> SO <sub>4</sub> | 1.5 mM (NH <sub>4</sub> ) <sub>2</sub> SO <sub>4</sub> |                       | <u>1</u> | 31 | 1  | 38 | [8] |
| <b>PtCuNi</b>                             | —          | Ti plate   | 0.1 M Na <sub>2</sub> SO <sub>4</sub> | 1.5 mM (NH <sub>4</sub> ) <sub>2</sub> SO <sub>4</sub> |                       | <u>1</u> | 5  | 17 | 22 | [8] |
| <b>PtCu</b>                               | —          | Ti plate   | 0.1 M Na <sub>2</sub> SO <sub>4</sub> | 1.5 mM (NH <sub>4</sub> ) <sub>2</sub> SO <sub>4</sub> |                       | <u>2</u> | 1  | 7  | 44 | [8] |
| <b>PtCu</b>                               | —          | Ti plate   | 0.1 M Na <sub>2</sub> SO <sub>4</sub> | 5 mM (NH <sub>4</sub> ) <sub>2</sub> SO <sub>4</sub>   |                       | <u>1</u> | 5  | 28 | 48 | [8] |

|                                           |                    |            |                                                 |                                                      |                     |    |    |    |    |      |
|-------------------------------------------|--------------------|------------|-------------------------------------------------|------------------------------------------------------|---------------------|----|----|----|----|------|
|                                           |                    |            |                                                 | O <sub>4</sub>                                       |                     |    |    |    |    |      |
| <b>Cu</b>                                 | P4 Ceramic frit    | Pt/Ti mesh | 0.1 M KOH                                       | 0.1 M NH <sub>4</sub> OH                             | <u>2.0 vs. RHE</u>  |    |    | 0  | 18 | [9]  |
| <b>Ni</b>                                 | P4 Ceramic frit    | Pt/Ti mesh | 0.1 M KOH                                       | 0.1 M NH <sub>4</sub> OH                             | <u>2.0 vs. RHE</u>  |    |    | 8  | 19 | [9]  |
| <b>Ni(OH)<sub>2</sub></b>                 | Fumasep FAB-PK-130 | Ni foam    | 0.1 M Na <sub>2</sub> SO <sub>4</sub>           | 0.2 M NH <sub>4</sub> OH                             | <u>1.6 vs. RHE</u>  | 6  | 53 | 28 | 18 | [10] |
| <b>Ni(OH)<sub>2</sub></b>                 | Fumasep FAB-PK-130 | Ni foam    | 0.1 M Na <sub>2</sub> SO <sub>4</sub>           | 0.2 M NH <sub>4</sub> OH                             | <u>1.9 vs. RHE</u>  | 18 | 89 | 9  | 42 | [10] |
| <b>Ni(OH)<sub>2</sub></b>                 | Fumasep FAB-PK-130 | Ni foam    | 0.1 M Na <sub>2</sub> SO <sub>4</sub> , pH 12.8 | 0.2 M NH <sub>4</sub> OH                             | <u>1.9 vs. RHE</u>  |    |    | 39 | 9  | [10] |
| <b>Ni(OH)<sub>2</sub></b>                 | Fumasep FAB-PK-130 | Ni foam    | 0.1 M NaOH                                      | 0.2 M NH <sub>4</sub> OH                             | <u>1.6 vs. RHE</u>  | 10 | 34 | 58 | 1  | [10] |
| <b>Ni(OH)<sub>2</sub></b>                 | Fumasep FAB-PK-130 | Ni foam    | 0.1 M NaOH                                      | 0.2 M NH <sub>4</sub> OH                             | <u>1.9 vs. RHE</u>  | 28 | 20 | 39 | 9  | [10] |
| <b>SnO<sub>2</sub></b>                    | —                  | Pt Foil    | 0.5 M K <sub>2</sub> SO <sub>4</sub> , pH 11    | 5 mM (NH <sub>4</sub> ) <sub>2</sub> SO <sub>4</sub> | <u>1.45 vs. RHE</u> | 1  | 84 | 7  | 3  | [11] |
| <b>SnO<sub>2</sub></b>                    | —                  | Pt Foil    | 0.5 M K <sub>2</sub> SO <sub>4</sub> , pH 11    | 5 mM (NH <sub>4</sub> ) <sub>2</sub> SO <sub>4</sub> | <u>1.75 vs. RHE</u> | 1  | 25 | 4  | 16 | [11] |
| <b>Ni(OH)<sub>2</sub>/SnO<sub>2</sub></b> | —                  | Pt Foil    | 0.5 M K <sub>2</sub> SO <sub>4</sub> , pH 11    | 5 mM (NH <sub>4</sub> ) <sub>2</sub> SO <sub>4</sub> | <u>1.45 vs. RHE</u> | 1  | 90 | 1  | 0  | [11] |
| <b>Ni(OH)<sub>2</sub>/SnO<sub>2</sub></b> | —                  | Pt Foil    | 0.5 M K <sub>2</sub> SO <sub>4</sub> , pH 11    | 5 mM (NH <sub>4</sub> ) <sub>2</sub> SO <sub>4</sub> | <u>1.75 vs. RHE</u> | 2  | 43 | 0  | 31 | [11] |
| <b>Ni(OH)<sub>2</sub></b>                 | —                  | Pt Foil    | 0.5 M K <sub>2</sub> SO <sub>4</sub> , pH 11    | 5 mM (NH <sub>4</sub> ) <sub>2</sub> SO <sub>4</sub> | <u>1.45 vs. RHE</u> | 1  | 93 | 9  | 1  | [11] |
| <b>Ni(OH)<sub>2</sub></b>                 | —                  | Pt Foil    | 0.5 M K <sub>2</sub> SO <sub>4</sub> , pH 11    | 5 mM (NH <sub>4</sub> ) <sub>2</sub> SO <sub>4</sub> | <u>1.75 vs. RHE</u> | 1  | 24 | 4  | 1  | [11] |
| <b>Ni</b>                                 | P4                 | Pt/Ti      | 0.1 M                                           | 0.5 M                                                | <u>1.0 vs.</u>      |    |    | 14 | 5  | [12] |

|                                                    |               |                  |                                               |                                                        |                         |          |  |    |    |         |
|----------------------------------------------------|---------------|------------------|-----------------------------------------------|--------------------------------------------------------|-------------------------|----------|--|----|----|---------|
|                                                    | glass frit    | Mesh             | K <sub>2</sub> HPO <sub>4</sub>               | NH <sub>4</sub> OH                                     | <u>SHE</u>              |          |  |    |    |         |
| <b>β-NiOOH</b>                                     | P4 glass frit | Pt/Ti Mesh       | 0.1 M K <sub>2</sub> HPO <sub>4</sub>         | 0.5 M NH <sub>4</sub> OH                               | <u>1.0 vs. SHE</u>      |          |  | 13 | 16 | [12]    |
| <b>CoO<sub>x</sub>H<sub>y</sub>/β-NiOOH</b>        | P4 glass frit | Pt/Ti Mesh       | 0.1 M K <sub>2</sub> HPO <sub>4</sub>         | 0.5 M NH <sub>4</sub> OH                               | <u>1.0 vs. SHE</u>      | 2        |  | 38 | 41 | [12]    |
| <b>Cu</b>                                          | —             | Pt foil          | 0.5 M K <sub>2</sub> SO <sub>4</sub> , pH 11  | 5 mM (NH <sub>4</sub> ) <sub>2</sub> SO <sub>4</sub>   | <u>1.65 vs. RHE</u>     |          |  | 42 | 2  | 49 [13] |
| <b>Cu<sub>2</sub>Co<sub>1</sub></b>                | —             | Pt foil          | 0.5 M K <sub>2</sub> SO <sub>4</sub> , pH 11  | 5 mM (NH <sub>4</sub> ) <sub>2</sub> SO <sub>4</sub>   | <u>1.65 vs. RHE</u>     |          |  | 73 | 1  | 26 [13] |
| <b>Cu<sub>1</sub>Co<sub>4</sub></b>                | —             | Pt foil          | 0.5 M K <sub>2</sub> SO <sub>4</sub> , pH 11  | 5 mM (NH <sub>4</sub> ) <sub>2</sub> SO <sub>4</sub>   | <u>1.65 vs. RHE</u>     |          |  | 60 | 0  | 40 [13] |
| <b>Co</b>                                          | —             | Pt foil          | 0.5 M K <sub>2</sub> SO <sub>4</sub> , pH 11  | 5 mM (NH <sub>4</sub> ) <sub>2</sub> SO <sub>4</sub>   | <u>1.55 vs. RHE</u>     |          |  | 65 | 3  | 32 [13] |
| <b>CuCo</b>                                        | —             | Pt foil          | 0.5 M K <sub>2</sub> SO <sub>4</sub> , pH 11  | 5 mM (NH <sub>4</sub> ) <sub>2</sub> SO <sub>4</sub>   | <u>1.65 vs. RHE</u>     |          |  | 77 | 1  | 23 [13] |
| <b>Ni</b>                                          | —             | IrO <sub>2</sub> | 0.1 M Na <sub>2</sub> SO <sub>4</sub>         | 1.5 mM (NH <sub>4</sub> ) <sub>2</sub> SO <sub>4</sub> |                         | <u>2</u> |  | 3  | 2  | 8 [14]  |
| <b>Ni<sub>400</sub><sup>c</sup><sup>b</sup></b>    | —             | IrO <sub>2</sub> | 0.1 M Na <sub>2</sub> SO <sub>4</sub>         | 1.5 mM (NH <sub>4</sub> ) <sub>2</sub> SO <sub>4</sub> |                         | <u>2</u> |  | 10 | 4  | 22 [14] |
| <b>Ag/Ni<sub>400</sub><sup>c</sup><sup>b</sup></b> | —             | IrO <sub>2</sub> | 0.1 M Na <sub>2</sub> SO <sub>4</sub>         | 1.5 mM (NH <sub>4</sub> ) <sub>2</sub> SO <sub>4</sub> | <u>1.8V vs. RHE</u>     | <u>2</u> |  | 32 | 5  | 19 [14] |
| <b>Ni foam</b>                                     | —             | DSA <sup>c</sup> | 10 mM Na <sub>2</sub> SO <sub>4</sub> , pH 11 | 2 mM (NH <sub>4</sub> ) <sub>2</sub> SO <sub>4</sub>   | <u>0.7 vs. Hg/HgO</u>   |          |  | 5  | 64 | 14 [15] |
| <b>Ni foam</b>                                     | —             | DSA <sup>c</sup> | 10 mM Na <sub>2</sub> SO <sub>4</sub> , pH 11 | 2 mM (NH <sub>4</sub> ) <sub>2</sub> SO <sub>4</sub>   | <u>1.0 vs. Hg/HgO</u>   |          |  | 1  | 3  | 47 [15] |
| <b>Cu/NF</b>                                       | —             | DSA <sup>c</sup> | 10 mM Na <sub>2</sub> SO <sub>4</sub> , pH 11 | 2 mM (NH <sub>4</sub> ) <sub>2</sub> SO <sub>4</sub>   | <u>0.7 vs. Hg/HgO</u>   |          |  | 15 | 59 | 28 [15] |
| <b>Cu/NF</b>                                       | —             | DSA <sup>c</sup> | 10 mM Na <sub>2</sub> SO <sub>4</sub> , pH 11 | 2 mM (NH <sub>4</sub> ) <sub>2</sub> SO <sub>4</sub>   | <u>1.0 vs. Hg/HgO</u>   |          |  | 5  | 2  | 81 [15] |
| <b>Ni(OH)<sub>2</sub>-Cu(OH)<sub>2</sub> / C</b>   | —             | Pt               | 0.1 M NaOH                                    | 50 mM NH <sub>4</sub> Cl                               | <u>0.55 vs. Ag/AgCl</u> | 9-2      |  |    | 0  | 9 [16]  |

|                          |   |    |           |                              |                    |        |  |    |  |      |
|--------------------------|---|----|-----------|------------------------------|--------------------|--------|--|----|--|------|
| $\text{Cu}_8\text{Ni}_2$ | — | Pt | 0.5 M KOH | 55 mM $\text{NH}_4\text{Cl}$ | <u>1.6V vs RHE</u> | 53     |  | 67 |  | [17] |
| CuNi-<br>'L@(-196)       | — | Pt | 0.5 M KOH | 55 mM $\text{NH}_4\text{Cl}$ | <u>1.7V vs RHE</u> | 106-28 |  | 5  |  | [18] |

<sup>a</sup> Oxygen vacancies; <sup>b</sup> Annealed at 400 °C; <sup>c</sup> Dimensionally stable anode

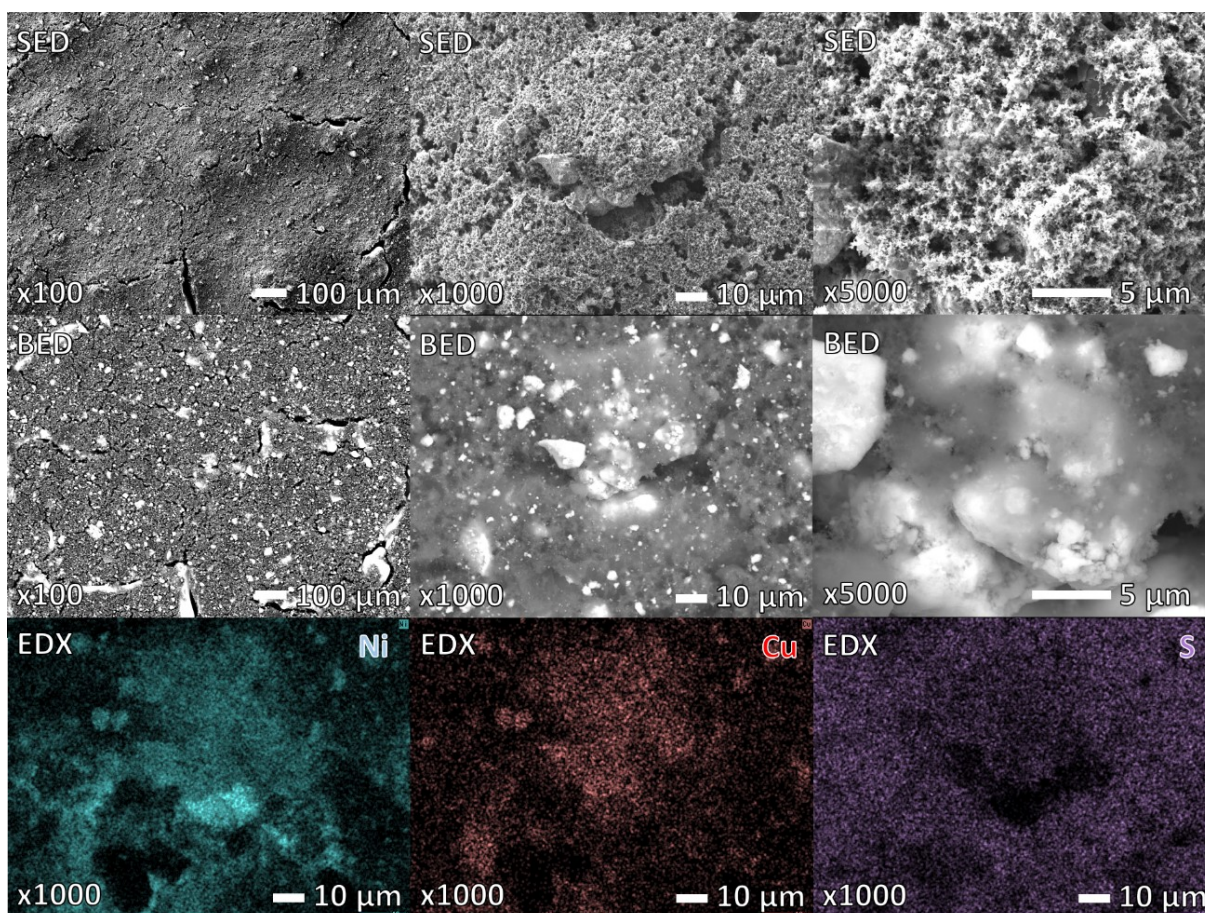

**Figure S1.** EDS and SEM of an unused  $\text{NiCu}_{0.2}$  electrode, showing the particle distribution within the electrode. High porosity is achieved through the phase inversion method. Reduction in  $\text{K}_2\text{SO}_4$  contamination is visualized with EDS of S. Both secondary electron detector (SED) and backscatter electron detector (BED) modes of SEM are applied to show topography and composition, respectively.

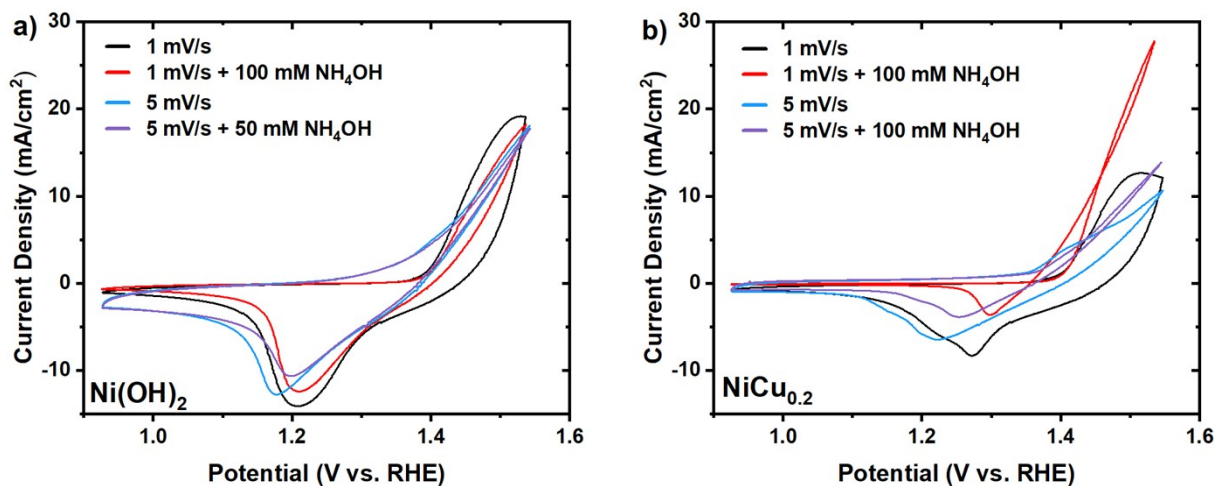

**Figure S2.** Cyclic voltammetry of a)  $\text{Ni(OH)}_2$  and b)  $\text{NiCu}_{0.2}$  in 1 M KOH with and without  $\text{NH}_4\text{OH}$  at both 1 mV/s and 5 mV/s Scan rate.

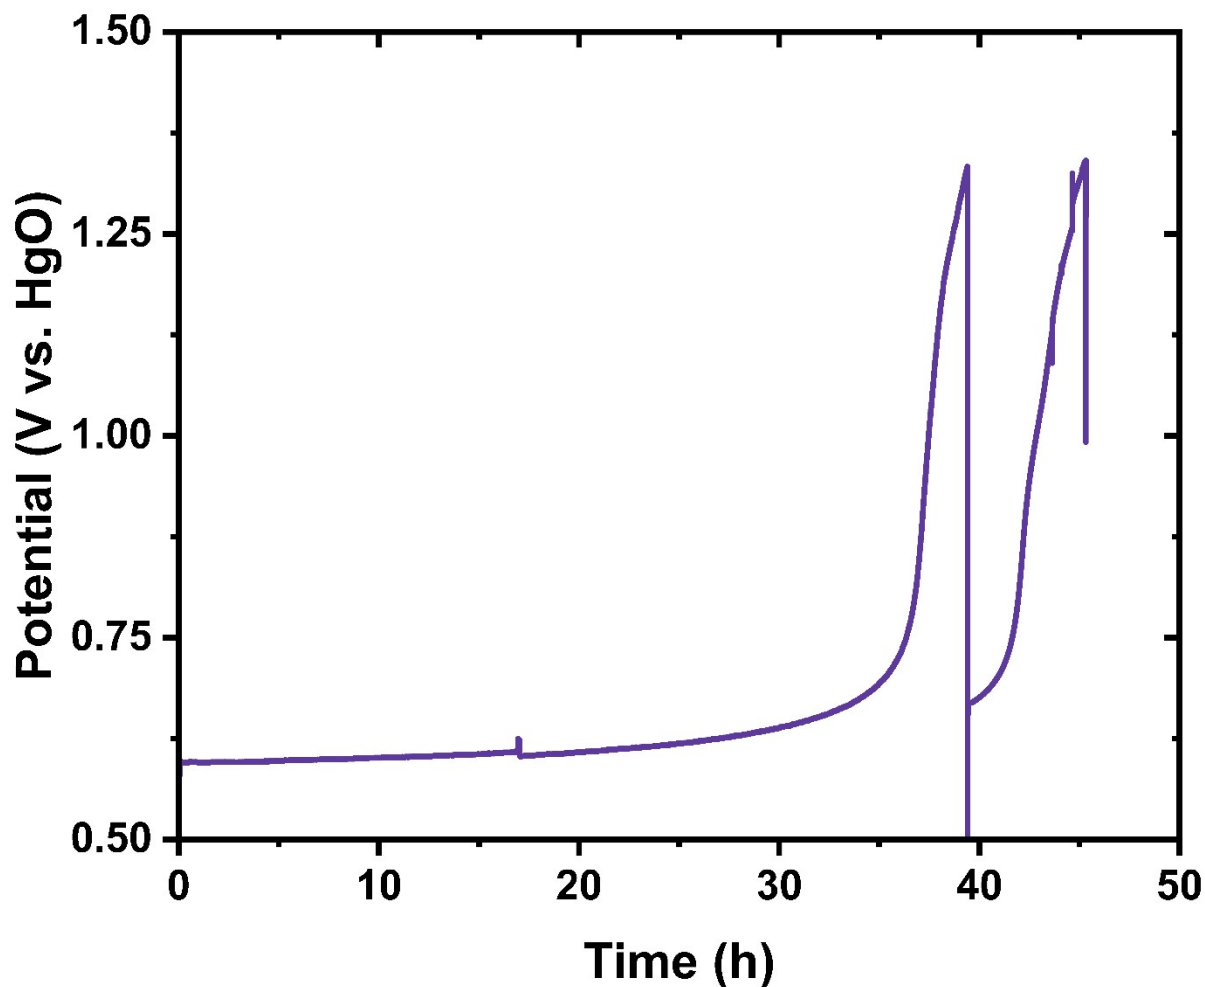

**Figure S3.** chronopotentiometry at  $10 \text{ mA/cm}^2$  in 1 M KOH divided by a nafion 117 membrane. when the potential peaked, the cell was shut-off. at that moment  $R_r$  was 1000 ohm and pH of 8. Cell recovers slowly over time due to concentration gradient resulting in transport back. Cell was turned on again after 24 hours and spliced after the initial shutdown.

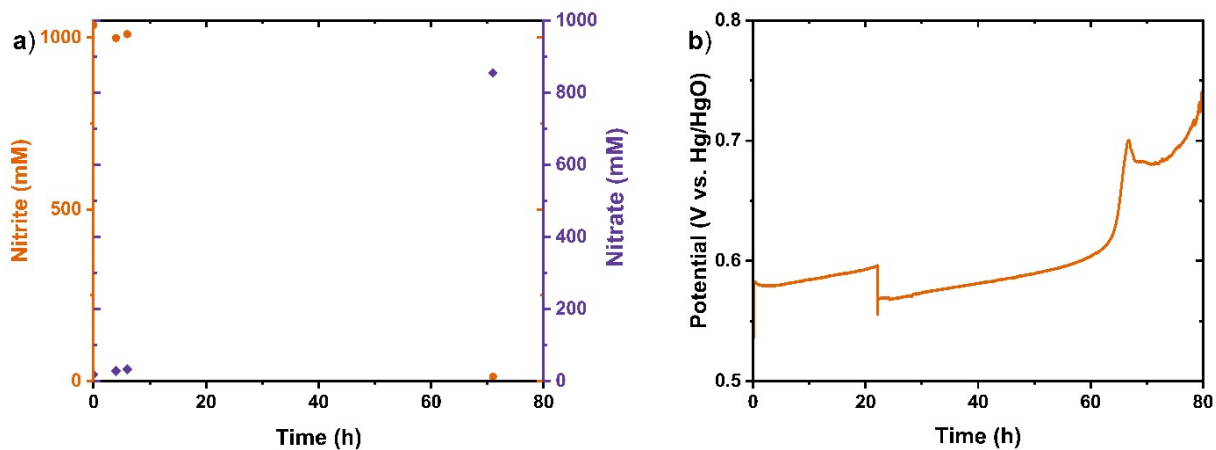

**Figure S4.** a) Nitrite and nitrate concentration related to chronopotentiometry in 1M KOH with 1 M  $\text{KNO}_2$  at  $10 \text{ mA/cm}^2$ . b) Potential measured during the chronopotentiometric measurement in 2x50 mL Nafion 117 membrane cell.

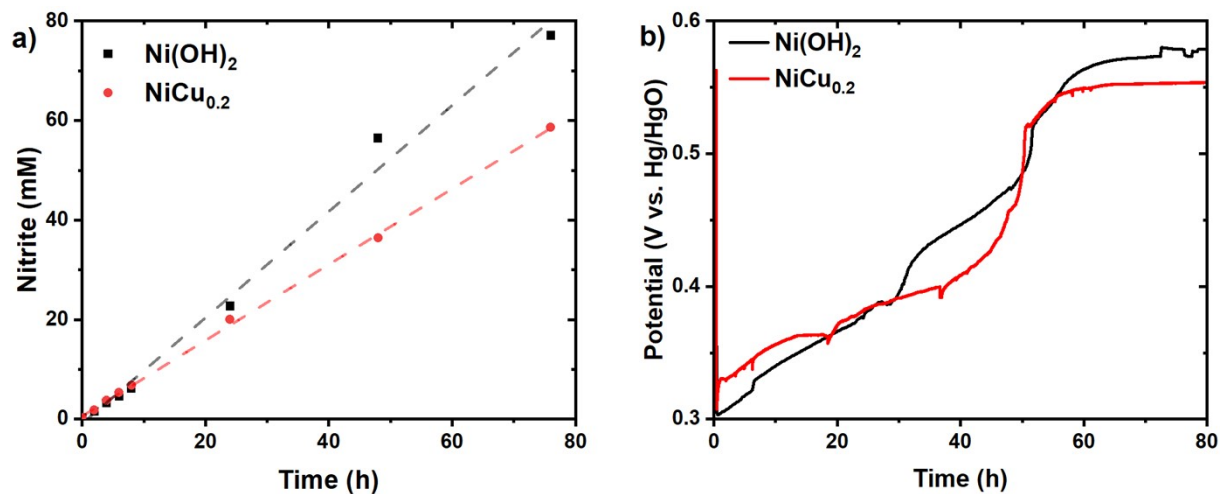

**Figure S5.** Chronopotentiometry of  $\text{Ni(OH)}_2$  and  $\text{NiCu}_{0.2}$  in 6 M KOH with 1 M  $\text{NH}_3$  at  $2.5 \text{ mA/cm}^2$  with 2x50 mL 117 Nafion cell. a) measured nitrite concentration and b) potential during the chronopotentiometry. Showing the increased production rate on  $\text{Ni(OH)}_2$  due to the increased potential.

## References

- [1] K.-W. Kim, Y.-J. Kim, I.-T. Kim, G.-I. Park, E.-H. Lee, "Electrochemical conversion characteristics of ammonia to nitrogen" *Water Research* **2006**, *40*, 1431–1441.
- [2] E. P. Bonnin, E. J. Biddinger, G. G. Botte, "Effect of catalyst on electrolysis of ammonia effluents" *Journal of Power Sources* **2008**, *182*, 284–290.
- [3] W. Xu, D. Du, R. Lan, J. Humphreys, D. N. Miller, M. Walker, Z. Wu, J. T. S. Irvine, S. Tao, "Electrodeposited NiCu bimetal on carbon paper as stable non-noble anode for efficient electrooxidation of ammonia" *Applied Catalysis B: Environmental* **2018**, *237*, 1101–1109.
- [4] Y.-J. Shih, Y.-H. Huang, C. P. Huang, "Electrocatalytic ammonia oxidation over a nickel foam electrode: Role of Ni(OH)<sub>2</sub>(s)-NiOOH(s) nanocatalysts" *Electrochimica Acta* **2018**, *263*, 261–271.
- [5] M. Zhu, Y. Yang, S. Xi, C. Diao, Z. Yu, W. S. V. Lee, J. Xue, "Deciphering NH<sub>3</sub> Adsorption Kinetics in Ternary Ni–Cu–Fe Oxyhydroxide toward Efficient Ammonia Oxidation Reaction" *Small* **2021**, *17*, 2005616.
- [6] S. Johnston, L. Kemp, B. Turay, A. N. Simonov, B. H. R. Suryanto, D. R. MacFarlane, "Copper-Catalyzed Electrosynthesis of Nitrite and Nitrate from Ammonia: Tuning the Selectivity via an Interplay Between Homogeneous and Heterogeneous Catalysis" *ChemSusChem* **2021**, *14*, 4793–4801.
- [7] J. Huang, Z. Chen, J. Cai, Y. Jin, T. Wang, J. Wang, "Activating copper oxide for stable electrocatalytic ammonia oxidation reaction via in-situ introducing oxygen vacancies" *Nano Res.* **2022**, *15*, 5987–5994.
- [8] S. S. Prabowo Rahardjo, Y.-J. Shih, "Electrocatalytic Ammonia Oxidation Mediated by Nickel and Copper Crystallites Decorated with Platinum Nanoparticle (PtM/G, M = Cu, Ni)" *ACS Sustainable Chem. Eng.* **2022**, *10*, 5043–5054.
- [9] S. Johnston, S. Cohen, C. K. Nguyen, K. N. Dinh, T. D. Nguyen, S. Giddey, C. Munnings, A. N. Simonov, D. R. MacFarlane, "A Survey of Catalytic Materials for Ammonia Electrooxidation to Nitrite and Nitrate" *ChemSusChem* **2022**, *15*, e202200614.
- [10] J. J. Medvedev, Y. Tobolovskaya, X. V. Medvedeva, S. W. Tatarchuk, F. Li, A. Klinkova, "Pathways of ammonia electrooxidation on nickel hydroxide anodes and an alternative route towards recycled fertilizers" *Green Chem.* **2022**, *24*, 1578–1589.
- [11] J. Hou, Y. Cheng, H. Pan, P. Kang, "Tailored Bimetallic Ni–Sn Catalyst for Electrochemical Ammonia Oxidation to Dinitrogen with High Selectivity" *Inorg. Chem.* **2023**, *62*, 3986–3992.
- [12] S. Cohen, S. Johnston, C. K. Nguyen, T. D. Nguyen, D. A. Hoogeveen, D. V. Zeil, S. Giddey, A. N. Simonov, D. R. MacFarlane, "A CoOxHy/β-NiOOH electrocatalyst for robust ammonia oxidation to nitrite and nitrate" *Green Chem.* **2023**, *25*, 7157–7165.
- [13] J. Cui, J. Hou, H. Pan, P. Kang, "Self-supporting CuM LDH (M = Ni, Fe, Co) carbon cloth electrodes for selective electrochemical ammonia oxidation to nitrogen" *Journal of Electroanalytical Chemistry* **2023**, *940*, 117502.
- [14] S. S. P. Rahardjo, Y.-J. Shih, "Electrochemical characteristics of silver/nickel oxide (Ag/Ni) for direct ammonia oxidation and nitrogen selectivity in paired electrode system" *Chemical Engineering Journal* **2023**, *452*, 139370.
- [15] M.-H. Tsai, Y. Juang, C.-C. Hu, L.-C. Hua, B. K. Mahata, C. Huang, "The direct electrocatalytic oxidation of ammonia by copper-deposited nickel foam catalysts" *Electrochimica Acta* **2023**, *446*, 142130.
- [16] W. Xu, R. Lan, D. Du, J. Humphreys, M. Walker, Z. Wu, H. Wang, S. Tao, "Directly growing hierarchical nickel-copper hydroxide nanowires on carbon fibre cloth for efficient electrooxidation of ammonia" *Applied Catalysis B: Environmental* **2017**, *218*, 470–479.
- [17] Z. Mao, Y. Tian, B. Guo, R. Chen, Y. Zeng, F. Hou, X. Yan, J. Liang, "Modulation of charge distribution enabling CuNi nano-alloys for efficient ammonia oxidation reaction to nitrite production" *Chemical Engineering Journal* **2024**, *484*, 149570.
- [18] Y. Tian, R. Chen, X. Liu, Z. Mao, H. Tan, D. Yang, F. Hou, X. Liu, L. Yin, X. Yan, J. Liang, "Highly stabilized and selective ammonia electro-oxidation over CuNi metallic glass nanoarray" *Carbon Energy* **2025**, *7*, e667.
- [19] P. Jungbacker, R. Kortlever and F. M. Mulder, *Green Chem.*, **2026**, DOI: 10.1039/D5GC05480J
